# Supplementary material for: Indium tin oxide as a dual-band compatible stealth material with low infrared emissivity and strong microwave absorption
Source: Royal Society of Chemistry journal article supplement (doi:10.1039/d2tc04722e), 2023-01-01
Supplement: d2tc04722e1.pdf [file d2tc04722e1.pdf]

## Supporting Information

### Indium Tin Oxide as a Dual-band Compatible Stealth Material with Low Infrared Emissivity and Strong Microwave Absorption

Yang Xu,<sup>a</sup> Gengping Wan,<sup>a</sup> \* Lingling Ma,<sup>a</sup> Ying Zhang,<sup>a</sup> Yanran Su,<sup>a, b</sup> Disheng Liu,<sup>a, b</sup> Guizhen Wang<sup>a, b</sup> \*

<sup>a</sup> State Key Laboratory of Marine Resource Utilization in South China Sea, School of Chemical Engineering and Technology, Hainan University, Haikou, Hainan, 570228, China.

<sup>b</sup> Collaborative Innovation Center of Ecological Civilization, Hainan University, Haikou, Hainan, 570228, China.

\* Corresponding author. Tel: +86 0898 66268172; Fax: +86 0898 66168037; E-mail address: wangengping001@163.com (Gengping Wang); wangguizhen0@hotmail.com (Guizhen Wang).

#### Apparatus

The morphologies of the particles were analyzed by field emission scanning electron microscopy (FESEM, Verios G4 UC), transmission electron microscopy (TEM, Talos F200X G2), selected area electron diffraction (SAED) and energy dispersive spectroscopy (EDS). The phase and crystal structure were characterized by X-ray diffraction (X-ray diffraction, Smart Lab II, Cu K $\alpha$  radiation instrument) and X-ray photoelectron spectroscopy (XPS, AXIS SUPRA, Al K $\alpha$  light source). The surface area of the samples was determined by N<sub>2</sub> adsorption-desorption isotherms (TriStar II 20). The resistance of the sample was measured with a digital micro-ohmmeter. The emissivity of the samples was tested with a FT-IR (Nicolet is50), a blackbody radiation source and a heating stage (HCS601G-IRM). The relative permeability and permittivity values of the hybrid were obtained by measuring the S11 and S21 parameters between 2~18 GHz with a vector network analyzer (Agilent N5230A) by using the transmission/reflection coaxial line method.

#### Infrared emissivity tests

Pure ITO was pressed into solid round pieces with a thickness of about 2 mm. The emissivity characteristics of the material are analyzed according to the test results, and the infrared stealth mechanism of the material is further elaborated.

#### Microwave absorption performance tests

ITO (50 wt.%) was mixed with paraffin wax and pressed into a coaxial ring with an outer diameter of 7.00 mm, an inner diameter of 3.04 mm, and a thickness of about 2 mm. According to the EM parameters, the absorption characteristics of the material were inferred and analyzed, and the absorption mechanism of the material was further elaborated.

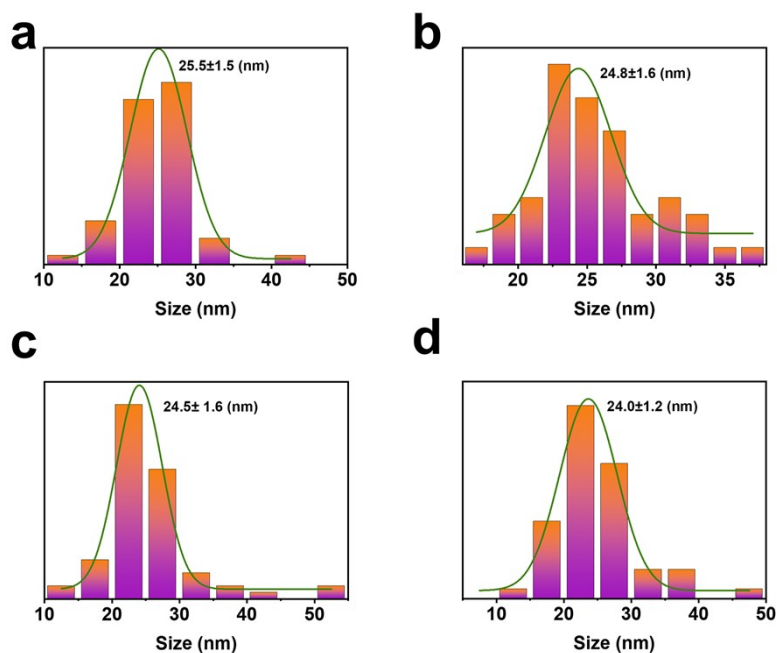

**Fig. S1.** Particle size distribution of (a) ITO-5, (b) ITO-10, (c) ITO-15, and (d) ITO-20, respectively.

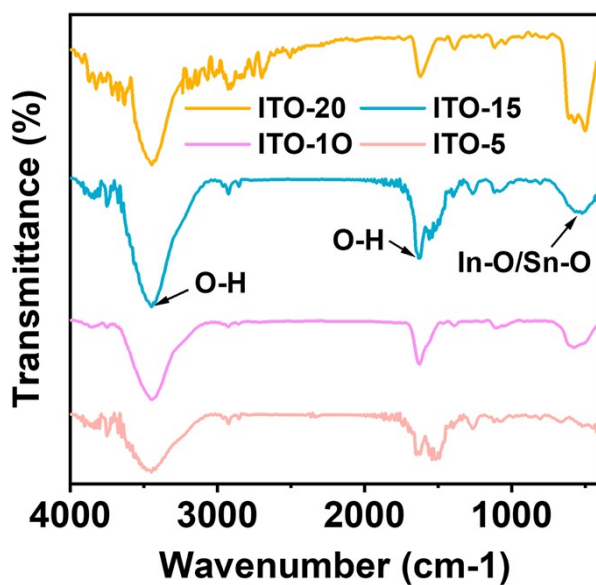

**Fig. S2.** FT-IR spectra of ITO samples.

As shown in the FT-IR spectra (Fig. S2), the adsorption bands at  $3450\text{ cm}^{-1}$  and  $1627\text{ cm}^{-1}$  are in O-H stretching mode, which proves the existence of water molecules. Meanwhile, the Sn-O and In-O vibrations are also successfully observed at  $570\text{ cm}^{-1}$  and  $499\text{ cm}^{-1}$ .

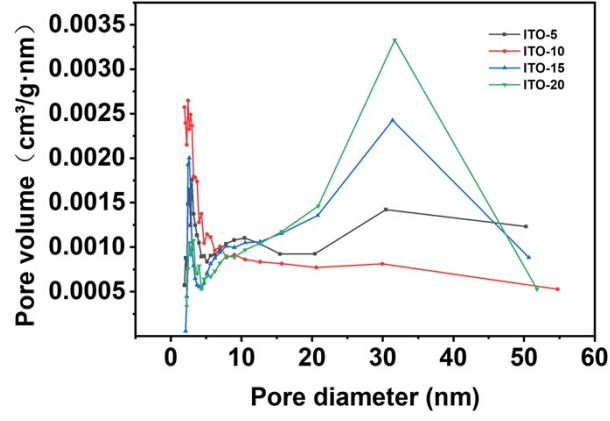

**Fig. S3.** Pore size distribution.

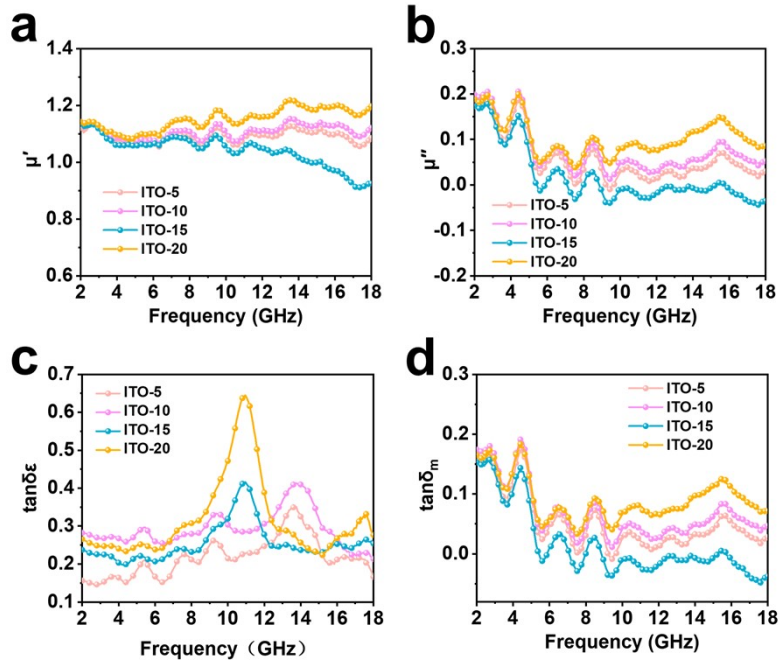

**Fig. S4.** (a) Magnetic permeability real part for ITO samples, (b) magnetic permeability imaginary part for ITO samples, (c)  $\tan\delta_e$  for samples, and (d)  $\tan\delta_m$  for ITO samples.

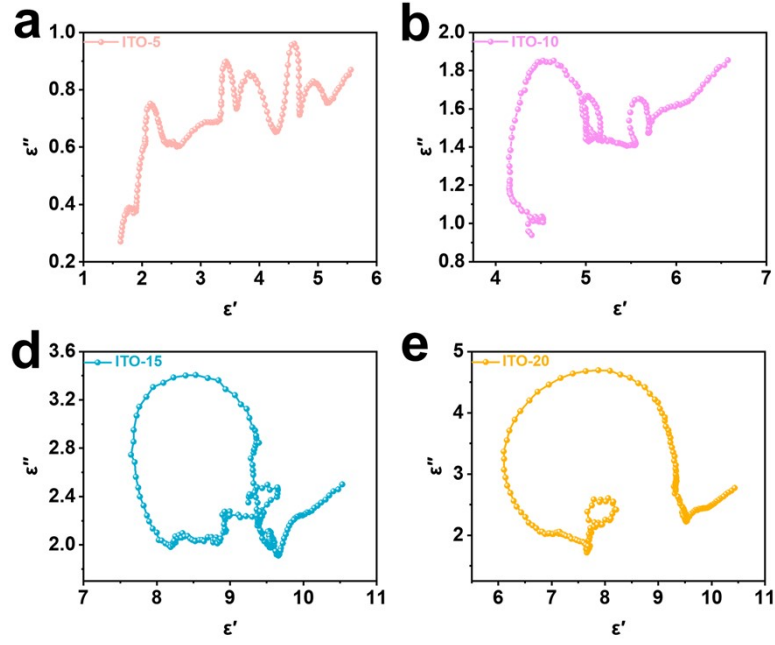

**Fig. S5.** The original Cole-Cole plots of (a) ITO-5, (b) ITO-10, (c) ITO-15, and (d) ITO-20, respectively.

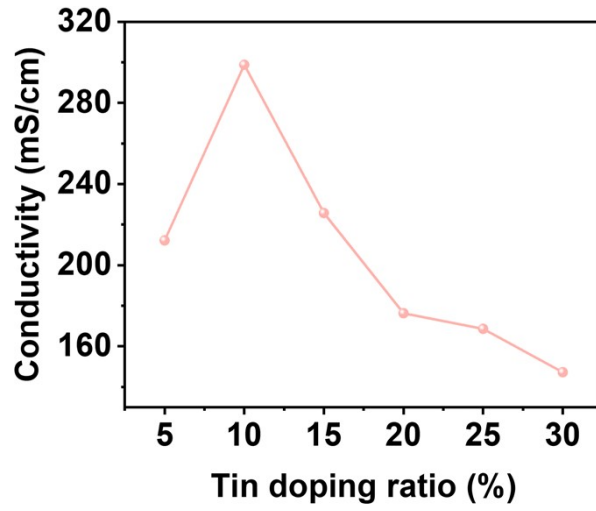

**Fig. S6.** Conductivity of ITO samples.

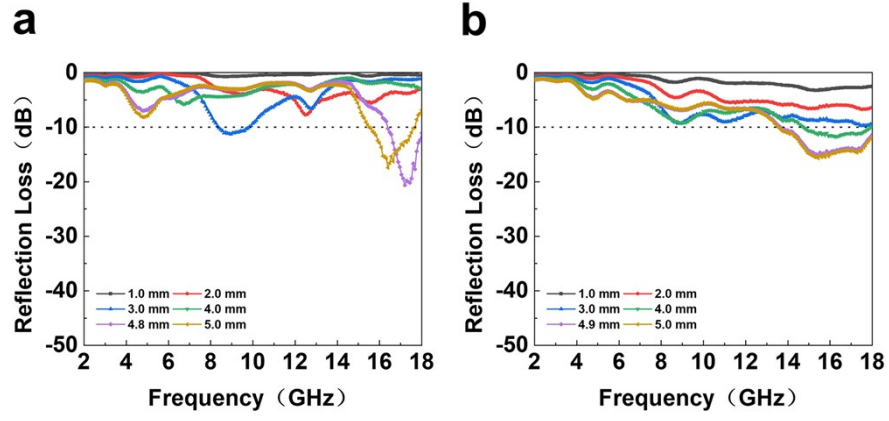

**Fig. S7.** Reflection loss for (a) ITO-25 and (b) ITO-30.

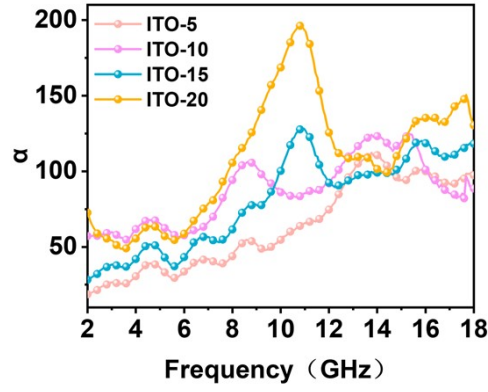

**Fig. S8.** Attenuation constants for ITO-5, ITO10, ITO-15 and ITO-20.
